# Supplementary material
Source: publisher figshare collection journal article supplement (https://geolsoc.figshare.com/ndownloader/files/28250006)
Supplement: Supplementary file 1 [file 28250006]

Table 5. Zircon U-Pb geochronology Bridges of Ross
Sample 411A		Bridges of Ross		GPS coordinates:			52.5914679	-9.8750846
Zircon	207U/235Pb	2 sigma	206U/238Pb	2 sigma	Rho	238U/206Pb	2 sigma	207Pb/206Pb	2 sigma	Rho	206Pb/238U (Ma)	2 sigma (Ma)	207Pb/235U (Ma)	2 sigma (Ma)	207Pb/206Pb (Ma)	2 sigma (Ma)	Concordia age (Ma)	Concordia age error (Ma)	Probability
411A g1r	0.855	0.026	0.1039	0.0022	0.46	9.62	0.2	0.06	0.0017	0.33	637	13	627	19	604	17	633	11	0.162
411A g1c	0.854	0.036	0.1049	0.0026	0.24	9.53	0.24	0.059	0.0024	0.29	643	16	627	26	567	23	638	13	0.136
411A g2r	0.933	0.033	0.1092	0.0021	0.31	9.16	0.18	0.0619	0.0021	0.25	668	13	669	24	671	23	668	11	0.901
411A g2c	0.989	0.052	0.1092	0.0032	0.16	9.16	0.27	0.0667	0.0041	0.3	668	20	698	37	828	51	677	16	0.045
411A g3r	6.87	0.18	0.3956	0.0081	0.33	2.528	0.052	0.1261	0.0033	0.43	2149	44	2095	55	2044	53	2104	22	0.004
411A g3c	6.73	0.13	0.3756	0.0069	0.74	2.662	0.049	0.1297	0.0017	0.35	2056	38	2077	40	2094	27	2081	16	0.066
411A g4r	6.39	0.11	0.3677	0.007	0.74	2.72	0.052	0.1259	0.0016	0.46	2019	38	2031	35	2041	26	2034	14	0.307
411A g4c	6.83	0.19	0.3817	0.0082	0.5	2.62	0.056	0.1297	0.0031	0.35	2084	45	2090	58	2094	50	2089	24	0.747
411A g5r	1.205	0.019	0.132	0.0024	0.52	7.58	0.14	0.0662	0.0011	0.61	799	15	803	13	813	14	802.5	8.7	0.537
411A g5c	4.34	0.1	0.3034	0.0077	0.63	3.296	0.084	0.1046	0.0021	0.39	1708	43	1701	39	1707	34	1700	19	0.642
411A g6r	6.24	0.12	0.3639	0.0094	0.5	2.748	0.071	0.1242	0.0025	0.72	2001	52	2010	39	2017	41	2011	17	0.627
411A g7c	0.715	0.019	0.0902	0.0017	0.38	11.09	0.21	0.0575	0.0015	0.35	557	10	548	15	511	13	553	8.8	0.13
411A g8c	0.912	0.018	0.1094	0.0028	0.58	9.14	0.23	0.0606	0.0012	0.64	669	17	658	13	625	12	658	10	0.093
411A g17	0.897	0.02	0.1071	0.002	0.59	9.34	0.17	0.0604	0.0012	0.34	656	12	650	14	618	12	652	10	0.255
411A g18	0.523	0.013	0.0689	0.0014	0.44	14.51	0.29	0.0551	0.0013	0.4	429.5	8.7	427	11	416	10	428.4	7.3	0.6
411A g20	0.444	0.017	0.0602	0.0013	0.04	16.61	0.36	0.0536	0.0022	0.51	376.8	8.1	373	14	354	15	375.7	6.7	0.59
411A g21	0.934	0.028	0.1102	0.0022	0.36	9.07	0.18	0.0614	0.0017	0.28	674	13	670	20	653	18	672	11	0.592
411A g22	0.831	0.033	0.1	0.0022	0.13	10	0.22	0.0604	0.0025	0.38	614	14	614	24	618	26	614	11	0.982
411A g23	0.524	0.019	0.0696	0.0015	0.08	14.37	0.31	0.0548	0.0022	0.46	433.7	9.3	428	16	404	16	431.8	7.6	0.428
411A g24	0.916	0.028	0.1071	0.002	0.47	9.34	0.17	0.0619	0.0017	0.18	656	12	660	20	671	18	657	11	0.532
411A g25	4.82	0.11	0.3243	0.0064	0.47	3.084	0.061	0.1076	0.0023	0.41	1811	36	1788	41	1759	38	1791	19	0.109
411A g27	3.328	0.075	0.2654	0.0049	0.42	3.768	0.07	0.0905	0.0018	0.4	1517	28	1488	34	1436	29	1494	17	0.012
411A g28	0.602	0.018	0.0777	0.0018	0.48	12.87	0.3	0.0558	0.0015	0.33	482	11	479	14	444	12	481	10	0.494
411A g29	0.881	0.023	0.1049	0.0019	0.45	9.53	0.17	0.0608	0.0015	0.25	643	12	642	17	632	16	642	10	0.803
411A g30	0.752	0.027	0.0918	0.0021	0.16	10.89	0.25	0.0597	0.0023	0.44	566	13	569	20	593	23	567	10	0.727
411A g31	0.765	0.017	0.0942	0.0018	0.53	10.62	0.2	0.0588	0.0011	0.44	580	11	577	13	560	10	578.3	8.9	0.488
411A g32	1.997	0.044	0.1922	0.0037	0.39	5.2	0.1	0.0754	0.0017	0.47	1133	22	1114	25	1079	24	1120	14	0.058
411A g34	0.88	0.027	0.1059	0.0025	0.34	9.44	0.22	0.0603	0.002	0.44	649	15	641	20	614	20	645	12	0.346
411A g35	1.881	0.06	0.1806	0.0042	0.46	5.54	0.13	0.0756	0.0022	0.3	1070	25	1074	34	1084	32	1073	19	0.717
411A g36	0.922	0.035	0.1078	0.0026	0.34	9.28	0.22	0.062	0.0023	0.33	660	16	663	25	674	25	661	13	0.724
411A g38	0.535	0.022	0.069	0.0015	0.21	14.49	0.32	0.0562	0.0022	0.19	430.1	9.4	435	18	460	18	431.3	8.3	0.519
411A g40	7.23	0.17	0.395	0.01	0.81	2.532	0.064	0.1335	0.0021	0.41	2146	54	2140	50	2145	34	2138	18	0.717
411A g42	0.631	0.023	0.0817	0.002	0.51	12.24	0.3	0.0559	0.0017	0.16	506	12	497	18	448	14	503	11	0.145
411A g43	7.05	0.14	0.3978	0.0078	0.5	2.514	0.049	0.1279	0.0026	0.61	2159	42	2118	42	2069	42	2118	18	0.009
411A g44	1.289	0.045	0.1398	0.0037	0.49	7.15	0.19	0.067	0.0021	0.26	844	22	841	29	838	26	842	18	0.796
411A g46	0.835	0.033	0.1033	0.0023	0.17	9.68	0.22	0.0587	0.0024	0.33	634	14	616	24	556	23	628	12	0.093
411A g48	0.852	0.019	0.1013	0.0021	0.58	9.87	0.2	0.0609	0.0012	0.4	622	13	626	14	636	13	625	10	0.479
411A g50	1.018	0.023	0.1181	0.0024	0.47	8.47	0.17	0.0626	0.0013	0.47	720	15	713	16	695	14	715	11	0.311
411A g51	1.42	0.044	0.1494	0.0037	0.61	6.69	0.17	0.069	0.0017	0.23	898	22	897	28	899	22	897	17	0.978
411A g53	7.54	0.21	0.4036	0.0087	0.59	2.478	0.053	0.1346	0.0032	0.28	2186	47	2178	61	2159	51	2178	25	0.627
411A g54	5.86	0.11	0.3567	0.0084	0.59	2.803	0.066	0.119	0.0021	0.65	1967	46	1955	37	1941	34	1954	16	0.499
411A g55	0.78	0.034	0.0936	0.0019	0.25	10.68	0.22	0.0608	0.0026	0.28	577	12	585	26	632	27	578	11	0.383
411A g57	0.452	0.017	0.0619	0.0012	0.1	16.16	0.31	0.0529	0.0021	0.39	387.2	7.5	379	14	325	13	385	6.5	0.201
411A g59	2.256	0.06	0.1978	0.0045	0.52	5.06	0.12	0.0826	0.002	0.38	1163	26	1199	32	1260	31	1190	18	0.001
411A g60	0.747	0.026	0.0915	0.0018	0.2	10.93	0.21	0.0592	0.0022	0.34	564	11	566	20	574	21	565	9.5	0.803
411A g61	0.883	0.015	0.1036	0.0019	0.55	9.65	0.18	0.0618	0.001	0.52	635	12	643	11	667	11	641.3	7.9	0.134
411A g62	1.218	0.034	0.136	0.0027	0.43	7.35	0.15	0.0647	0.0017	0.37	822	16	809	23	765	20	816	13	0.109
411A g63	0.788	0.018	0.0991	0.0019	0.34	10.09	0.19	0.0578	0.0014	0.47	609	12	590	13	522	13	598.2	8.7	0.002
411A g64	0.907	0.044	0.1056	0.0025	0.17	9.47	0.22	0.0625	0.0032	0.32	647	15	655	32	691	35	649	13	0.514
411A g65	7.41	0.23	0.393	0.012	0.73	2.545	0.078	0.1371	0.003	0.21	2137	65	2162	67	2191	48	2168	26	0.203
411A g66	0.895	0.031	0.1063	0.0023	0.39	9.41	0.2	0.061	0.0019	0.27	651	14	649	22	639	20	651	12	0.796
411A g67	0.526	0.013	0.0687	0.0014	0.38	14.56	0.3	0.0555	0.0014	0.44	428.3	8.7	429	11	432	11	428.7	7.1	0.861
411A g68	0.795	0.021	0.0942	0.0022	0.37	10.62	0.25	0.0613	0.0018	0.54	580	14	594	16	650	19	588	10	0.05
411A g69	0.746	0.038	0.0866	0.0037	0.26	11.55	0.49	0.0623	0.0036	0.57	535	23	566	29	684	40	550	18	0.024
411A g70	5.98	0.13	0.3553	0.0071	0.49	2.815	0.056	0.1222	0.0025	0.48	1960	39	1973	43	1989	41	1972	19	0.375
411A g71	0.77	0.03	0.0904	0.0021	0.43	11.06	0.26	0.0619	0.0023	0.04	558	13	580	23	671	25	563	12	0.008
411A g72	2.13	0.045	0.1996	0.0036	0.52	5.01	0.09	0.0773	0.0014	0.36	1173	21	1159	24	1129	20	1162	14	0.089
411A g74	3.786	0.088	0.2768	0.0062	0.78	3.613	0.081	0.099	0.0014	0.32	1575	35	1590	37	1605	23	1594	18	0.151
411A g75	0.686	0.034	0.0904	0.0022	0.29	11.06	0.27	0.0551	0.0026	0.21	558	14	530	26	416	20	552	12	0.008
411A g76	0.584	0.015	0.0767	0.0019	0.76	13.04	0.32	0.05517	0.00098	0.38	476	12	467	12	419.1	7.4	469	10	0.012
411A g77	1.504	0.034	0.156	0.0032	0.87	6.41	0.13	0.0698	0.0012	0.31	935	19	932	21	922	16	931	14	0.579
411A g78	7.1	0.12	0.3946	0.0084	0.56	2.534	0.054	0.1303	0.0022	0.66	2144	46	2124	36	2102	35	2122	15	0.222
411A g79	7.46	0.13	0.4048	0.007	0.61	2.47	0.043	0.1336	0.0019	0.41	2191	38	2168	38	2146	31	2166	15	0.076
411A g80	1.169	0.029	0.13	0.0024	0.66	7.69	0.14	0.0651	0.0013	0.16	788	15	786	20	778	16	787	12	0.763
411A g81	1.241	0.032	0.1383	0.0025	0.22	7.23	0.13	0.0651	0.0018	0.41	835	15	819	21	778	21	827	11	0.078
411A g82	2.082	0.091	0.1868	0.0047	0.29	5.35	0.13	0.0809	0.0035	0.28	1104	28	1143	50	1219	53	1119	22	0.02
411A g83	0.715	0.028	0.0896	0.0022	0.15	11.16	0.27	0.0581	0.0025	0.42	553	14	548	21	534	23	551	11	0.576
411A g84	0.785	0.025	0.0964	0.0022	0.67	10.37	0.24	0.0589	0.0013	0.11	593	14	588	19	563	12	591	12	0.369
411A g85	0.839	0.026	0.1013	0.0018	0.64	9.87	0.18	0.0599	0.0018	0.14	622	11	619	19	600	18	622	10	0.538
411A g86	2.473	0.056	0.2193	0.004	0.67	4.56	0.083	0.0816	0.0014	0.17	1278	23	1264	29	1236	21	1266	16	0.079
411A g87	0.837	0.022	0.1007	0.002	0.56	9.93	0.2	0.0602	0.0014	0.18	619	12	617	16	611	14	618	11	0.856
411A g88	1.377	0.044	0.1514	0.0044	0.67	6.61	0.19	0.0664	0.0017	0.32	909	26	879	28	819	21	883	19	0.001
411A g89	6.47	0.12	0.3709	0.0076	0.65	2.696	0.055	0.1264	0.002	0.51	2034	42	2042	38	2048	32	2043	16	0.559
411A g90	0.795	0.022	0.0983	0.0019	0.42	10.17	0.2	0.0584	0.0015	0.32	604	12	594	16	545	14	600	10	0.101
411A g91	0.745	0.035	0.094	0.0025	0.12	10.64	0.28	0.0583	0.0032	0.37	579	15	565	27	541	30	575	13	0.242
411A g92	0.779	0.033	0.0938	0.0029	0.37	10.66	0.33	0.061	0.0028	0.36	578	18	585	25	639	29	581	15	0.491
411A g93	0.705	0.053	0.0889	0.0026	0.32	11.25	0.33	0.0576	0.0042	0.11	549	16	542	41	515	38	548	15	0.632
411A g94	0.74	0.019	0.0926	0.0016	0.49	10.8	0.19	0.0578	0.0013	0.27	571	10	562	14	522	12	567.9	8.7	0.103
411A g95	1.366	0.038	0.1481	0.0031	0.45	6.75	0.14	0.0666	0.0017	0.32	890	19	874	24	825	21	881	14	0.073
411A g96	0.873	0.016	0.1038	0.0018	0.61	9.63	0.17	0.06092	0.00093	0.41	637	11	637	12	636	10	637	8.4	0.897
411A g98	0.793	0.021	0.0972	0.0019	0.19	10.29	0.2	0.0593	0.0017	0.5	598	12	593	16	578	17	595.6	8.9	0.486
411A g99	0.867	0.028	0.1027	0.0024	0.39	9.74	0.23	0.0604	0.0022	0.39	630	15	634	20	618	23	632	12	0.646
411A g100	0.877	0.02	0.1042	0.0024	0.43	9.6	0.22	0.0611	0.0015	0.52	639	15	639	15	643	16	639	10	0.955
411A g101	0.748	0.03	0.0946	0.0021	0.33	10.57	0.23	0.0579	0.0024	0.24	583	13	567	23	526	22	579	11	0.077
411A g102	7.39	0.16	0.4019	0.0076	0.43	2.488	0.047	0.1334	0.0029	0.45	2178	41	2160	47	2143	47	2161	19	0.258
411A g104	0.818	0.022	0.0988	0.002	0.47	10.12	0.2	0.06	0.0014	0.34	607	12	607	16	604	14	607	10	0.943
411A g105	0.738	0.033	0.0903	0.0022	0.1	11.07	0.27	0.0589	0.0027	0.39	557	14	561	25	563	26	558	11	0.723
411A g106	6.87	0.13	0.3889	0.008	0.55	2.571	0.053	0.1282	0.0024	0.53	2118	44	2095	40	2073	39	2093	17	0.143
411A g109	0.837	0.026	0.0997	0.0019	0.26	10.03	0.19	0.0607	0.0019	0.46	613	12	617	19	629	20	614	10	0.539
411A g110	0.821	0.02	0.0991	0.0021	0.51	10.09	0.21	0.0603	0.0014	0.36	609	13	609	15	614	14	609	10	0.928
411A g111	0.826	0.028	0.1032	0.0025	0.41	9.69	0.23	0.0585	0.002	0.3	633	15	611	21	549	19	623	13	0.008
411A g112	0.737	0.038	0.0897	0.0027	0.12	11.15	0.34	0.0592	0.0031	0.45	554	17	561	29	574	30	556	14	0.592
411A g113	0.544	0.019	0.0716	0.0015	0.02	13.97	0.29	0.0546	0.0022	0.51	445.8	9.3	441	15	396	16	444.2	7.4	0.536
411A g115	0.448	0.014	0.0614	0.0013	0.36	16.29	0.34	0.0529	0.0015	0.31	384.1	8.1	376	12	324.5	9.2	381.3	7.1	0.104
411A g117	5.89	0.19	0.347	0.013	0.79	2.88	0.11	0.1238	0.003	0.49	1920	72	1960	63	2012	49	1972	24	0.069
411A g118	6.58	0.14	0.3777	0.0074	0.48	2.648	0.052	0.1258	0.0025	0.51	2066	40	2057	44	2040	41	2057	19	0.562
411A g120	0.852	0.032	0.1041	0.0023	0.21	9.61	0.21	0.0594	0.0023	0.29	638	14	626	24	582	23	634	12	0.2
Sample 412		Bridges of Ross		GPS coordinates:			52.5914679	-9.8750846
Zircon	207U/235Pb	2 sigma	206U/238Pb	2 sigma	Rho	238U/206Pb	2 sigma	207Pb/206Pb	2 sigma	Rho	206Pb/238U (Ma)	2 sigma (Ma)	207Pb/235U (Ma)	2 sigma (Ma)	207Pb/206Pb (Ma)	2 sigma (Ma)	Concordia age (Ma)	Concordia age error (Ma)	Probability
412 g1r	0.527	0.018	0.0683	0.0017	0.2	14.64	0.36	0.0562	0.002	0.43	426	11	430	15	460	16	427.5	8.5	0.579
412 g1c	0.517	0.011	0.0671	0.0012	0.49	14.9	0.27	0.0555	0.0011	0.48	418.7	7.5	423.1	9	432.4	8.6	420.8	6.3	0.224
412 g2c	0.887	0.03	0.1054	0.0029	0.16	9.49	0.26	0.0609	0.0025	0.52	646	18	645	22	636	26	645	13	0.909
412 g3r	0.731	0.029	0.0925	0.002	0.2	10.81	0.23	0.0575	0.0024	0.36	570	12	557	22	511	21	566	11	0.158
412 g9	2.336	0.046	0.2095	0.0042	0.63	4.77	0.1	0.0808	0.0014	0.45	1226	25	1223	24	1217	21	1223	14	0.744
412 g10	0.833	0.02	0.1001	0.0017	0.49	9.99	0.17	0.0601	0.0012	0.3	615	10	615	15	607	12	615.1	9	0.958
412 g11	2.683	0.06	0.2285	0.0048	0.53	4.376	0.092	0.0851	0.0017	0.38	1327	28	1324	30	1318	26	1324	16	0.792
412 g12	0.863	0.021	0.1037	0.0019	0.34	9.64	0.18	0.0603	0.0015	0.43	636	12	632	15	614	15	634	9.2	0.508
412 g13	0.747	0.042	0.0917	0.0027	0.1	10.91	0.32	0.0591	0.0037	0.4	566	17	566	32	571	36	566	14	0.948
412 g14	3.062	0.078	0.2515	0.005	0.7	3.976	0.079	0.0881	0.0016	0.18	1446	29	1423	36	1385	25	1425	19	0.013
412 g15	3.092	0.059	0.2451	0.0044	0.77	4.08	0.073	0.0909	0.0012	0.4	1413	25	1431	27	1445	19	1434	14	0.019
412 g16	0.509	0.01	0.0672	0.0012	0.37	14.88	0.27	0.0552	0.0012	0.42	419.3	7.5	417.8	8.2	420.3	9.1	418.5	5.8	0.717
412 g17	0.775	0.055	0.0947	0.0033	0.16	10.56	0.37	0.0589	0.0042	0.3	583	20	583	41	563	40	583	18	0.97
412 g18	0.836	0.03	0.104	0.0026	0.34	9.62	0.24	0.0588	0.0022	0.35	638	16	617	22	560	21	629	13	0.022
412 g19	0.777	0.028	0.0957	0.0024	0.41	10.45	0.26	0.0589	0.002	0.32	589	15	584	21	563	19	587	13	0.51
412 g23	0.875	0.041	0.1028	0.0037	0.46	9.73	0.35	0.0621	0.0027	0.39	631	23	638	30	678	29	634	19	0.512
412 g24	6.28	0.14	0.36	0.01	0.77	2.782	0.077	0.1261	0.0021	0.64	1980	55	2016	45	2044	34	2026	17	0.037
412 g25	0.441	0.013	0.0595	0.0013	0.32	16.81	0.37	0.0535	0.0015	0.5	372.6	8.1	371	11	350	10	371.9	6.9	0.744
412 g26	0.848	0.025	0.1019	0.002	0.47	9.81	0.19	0.0606	0.0017	0.19	626	12	624	18	625	18	625	11	0.764
412 g27	6.69	0.14	0.3799	0.0089	0.65	2.632	0.062	0.1283	0.0025	0.37	2076	49	2071	43	2075	40	2071	18	0.783
412 g29	0.818	0.068	0.1069	0.0041	0.23	9.35	0.36	0.056	0.0048	0.28	655	25	607	50	452	39	643	22	0.015
412 g31	0.719	0.022	0.0899	0.0021	0.31	11.12	0.26	0.0581	0.0017	0.36	555	13	550	17	534	16	553	10	0.513
412 g32	0.718	0.04	0.0885	0.0023	0.15	11.3	0.29	0.0591	0.0033	0.34	547	14	549	31	571	32	547	13	0.824
412 g33	0.802	0.022	0.0983	0.002	0.34	10.17	0.21	0.0592	0.0016	0.4	604	12	598	16	574	16	601	10	0.349
412 g34	2.081	0.06	0.1907	0.0043	0.5	5.24	0.12	0.0791	0.0021	0.33	1125	25	1143	33	1175	31	1137	18	0.11
412 g35	3.531	0.079	0.269	0.0054	0.53	3.717	0.075	0.0948	0.0019	0.46	1536	31	1534	34	1524	31	1534	18	0.895
412 g37	0.704	0.019	0.0869	0.0018	0.36	11.51	0.24	0.0585	0.0017	0.47	537	11	541	15	549	16	539	9	0.522
412 g38	0.981	0.027	0.1131	0.0026	0.36	8.84	0.2	0.063	0.0017	0.43	691	16	694	19	708	19	693	12	0.679
412 g40	0.83	0.03	0.099	0.0023	0.35	10.1	0.23	0.0604	0.002	0.27	609	14	614	22	618	20	610	12	0.559
412 g42	0.751	0.037	0.0921	0.0024	0.16	10.86	0.28	0.0587	0.0029	0.34	568	15	569	28	556	27	568	13	0.942
412 g43	7.43	0.19	0.397	0.0095	0.55	2.519	0.06	0.1349	0.003	0.42	2155	52	2165	55	2163	48	2165	23	0.609
412 g44	0.814	0.024	0.0981	0.0023	0.34	10.19	0.24	0.0604	0.002	0.47	603	14	605	18	618	20	604	11	0.853
412 g45	0.843	0.046	0.1009	0.0036	0.35	9.91	0.35	0.061	0.0033	0.35	620	22	621	34	639	35	620	19	0.933
412 g46	0.861	0.033	0.1051	0.004	0.36	9.51	0.36	0.0592	0.0025	0.47	644	25	631	24	574	24	635	16	0.253
412 g48	0.846	0.024	0.1047	0.0025	0.53	9.55	0.23	0.0587	0.0014	0.33	642	15	622	18	556	13	630	12	0.004
412 g49	0.767	0.026	0.0933	0.0019	0.53	10.72	0.22	0.0593	0.0017	0.12	575	12	578	20	578	17	576	11	0.646
412 g50	0.532	0.014	0.0682	0.0012	0.37	14.66	0.26	0.0571	0.0016	0.3	425.3	7.5	433	11	495	14	427.7	6.6	0.096
412 g51	0.536	0.018	0.0714	0.0014	0.49	14.01	0.27	0.0543	0.0015	0.25	444.6	8.7	436	15	384	11	442.8	8.2	0.1
412 g54	1.588	0.066	0.1643	0.0037	0.24	6.09	0.14	0.0699	0.0029	0.36	981	22	966	40	925	38	975	18	0.294
412 g55	5.93	0.14	0.3545	0.0072	0.34	2.821	0.057	0.1214	0.003	0.55	1956	40	1966	46	1977	49	1964	20	0.566
412 g56	9.41	0.17	0.4419	0.0086	0.66	2.263	0.044	0.1542	0.0022	0.45	2359	46	2379	43	2393	34	2382	16	0.191
412 g58	0.706	0.028	0.0856	0.0028	0.45	11.68	0.38	0.0598	0.0023	0.33	529	17	542	22	596	23	536	14	0.141
412 g59	0.868	0.069	0.0976	0.0048	-0.05	10.25	0.5	0.0655	0.0064	0.56	600	30	634	50	790	77	613	22	0.157
412 g60	0.825	0.028	0.098	0.0023	0.21	10.2	0.24	0.0613	0.0023	0.43	603	14	611	21	650	24	606	11	0.375
412 g62	0.964	0.024	0.11	0.0023	0.49	9.09	0.19	0.0632	0.0015	0.31	673	14	685	17	715	17	680	11	0.054
412 g63	0.866	0.022	0.1004	0.0026	0.51	9.96	0.26	0.0626	0.0016	0.56	617	16	633	16	695	18	629	11	0.016
412 g64	6.76	0.14	0.3886	0.008	0.6	2.573	0.053	0.126	0.0022	0.43	2116	44	2081	43	2043	36	2078	18	0.017
412 g65	0.729	0.021	0.091	0.0017	0.22	10.99	0.21	0.0581	0.0018	0.38	561	10	556	16	534	17	559.4	8.6	0.436
412 g66	0.45	0.011	0.0598	0.0012	0.81	16.72	0.34	0.05496	0.00077	0	374.4	7.5	377.3	9.2	410.6	5.8	375.4	7.1	0.212
412 g67	6.93	0.16	0.3796	0.0074	0.47	2.634	0.051	0.1321	0.0028	0.39	2074	40	2103	49	2126	45	2100	20	0.068
412 g69	0.991	0.064	0.1162	0.0063	0.85	8.61	0.47	0.0618	0.0023	-0.12	709	38	699	45	667	25	701	32	0.328
412 g70	6.8	0.14	0.3806	0.0083	0.63	2.627	0.057	0.1291	0.0024	0.56	2079	45	2086	43	2086	39	2087	18	0.664
412 g71	1.627	0.033	0.1651	0.0029	0.42	6.06	0.11	0.0714	0.0014	0.47	985	17	981	20	969	19	982	12	0.58
412 g72	7.06	0.15	0.3905	0.0071	0.37	2.561	0.047	0.1312	0.0027	0.51	2125	39	2119	45	2114	44	2120	18	0.695
412 g73	0.733	0.021	0.0911	0.0021	0.36	10.98	0.25	0.0583	0.0016	0.44	562	13	558	16	541	15	560	10	0.593
412 g74	5.648	0.097	0.3387	0.0064	0.5	2.952	0.056	0.121	0.0021	0.58	1880	36	1923	33	1971	34	1924	15	0.001
412 g78	1.788	0.078	0.1749	0.0039	0.24	5.72	0.13	0.0742	0.0032	0.26	1039	23	1041	45	1047	45	1040	19	0.896
412 g79	0.832	0.019	0.0997	0.0019	0.39	10.03	0.19	0.0608	0.0015	0.35	613	12	615	14	632	16	613.8	9	0.729
412 g81	0.821	0.025	0.0991	0.0019	0.3	10.09	0.19	0.0598	0.0019	0.35	609	12	609	19	596	19	609	10	0.944
412 g82	3.981	0.08	0.2857	0.0054	0.6	3.5	0.066	0.1013	0.0015	0.36	1620	31	1630	33	1648	24	1630	16	0.34
412 g83	0.726	0.018	0.0882	0.0019	0.31	11.34	0.24	0.0598	0.0016	0.51	545	12	554	14	596	16	549.9	8.8	0.148
412 g84	2.121	0.046	0.1966	0.0036	0.55	5.086	0.093	0.0775	0.0017	0.41	1157	21	1156	25	1134	25	1156	14	0.87
412 g85	0.783	0.02	0.0953	0.0022	0.4	10.49	0.24	0.0599	0.0016	0.4	587	14	587	15	600	16	587	10	0.954
412 g86	7.01	0.22	0.38	0.011	0.69	2.632	0.076	0.134	0.0031	0.28	2076	60	2113	66	2151	50	2118	27	0.054
412 g88	0.786	0.036	0.1006	0.003	0.34	9.94	0.3	0.0569	0.0025	0.27	618	18	589	27	488	21	606	15	0.008
412 g89	0.895	0.028	0.107	0.0025	0.19	9.35	0.22	0.0608	0.0022	0.53	655	15	649	20	632	23	652	11	0.507
412 g90	0.798	0.02	0.0964	0.0016	0.36	10.37	0.17	0.0599	0.0014	0.31	593	10	596	15	600	14	594.1	8.4	0.682
412 g92	0.874	0.03	0.1041	0.0023	0.41	9.61	0.21	0.0613	0.0021	0.24	638	14	638	22	650	22	638	12	0.936
412 g93	4.5	0.11	0.3056	0.0075	0.5	3.272	0.08	0.107	0.0027	0.58	1719	42	1731	42	1749	44	1731	20	0.457
412 g94	0.524	0.015	0.0686	0.0016	0.44	14.58	0.34	0.0552	0.0016	0.46	428	10	428	12	420	12	427.8	8.3	0.984
412 g95	1.018	0.029	0.1189	0.0025	0.61	8.41	0.18	0.062	0.0014	0.09	724	15	713	20	674	15	719	13	0.076
412 g96	0.524	0.02	0.0694	0.002	0.38	14.41	0.42	0.0548	0.0021	0.35	433	12	428	16	404	15	431	10	0.506
412 g97	0.811	0.046	0.0996	0.0028	0.39	10.04	0.28	0.0597	0.0033	0.12	612	17	603	34	593	33	610	16	0.462
412 g98	0.939	0.045	0.1054	0.0019	0.51	9.49	0.17	0.0644	0.0026	-0.13	646	12	672	32	755	30	645	11	0.01
412 g99	0.837	0.035	0.1007	0.0028	0.06	9.93	0.28	0.06	0.0027	0.56	619	17	617	26	604	27	618	13	0.934
412 g100	0.836	0.022	0.0993	0.002	0.54	10.07	0.2	0.0614	0.0015	0.26	610	12	617	16	653	16	613	11	0.245
412 g104	0.863	0.03	0.0987	0.0019	0.3	10.13	0.2	0.0634	0.0021	0.24	607	12	632	22	722	24	613	10	0.003
412 g105	0.808	0.028	0.0942	0.0015	0.33	10.62	0.17	0.0621	0.002	0.11	580.3	9.2	601	21	678	22	583	8.6	0.006
412 g107	0.927	0.064	0.1001	0.0057	0.12	9.99	0.57	0.0668	0.0057	0.49	615	35	666	46	832	71	640	25	0.023
412 g108	5.878	0.093	0.3514	0.0061	0.55	2.846	0.049	0.1212	0.0019	0.55	1941	34	1958	31	1974	31	1959	14	0.17
412 g109	8.73	0.2	0.4344	0.0099	0.67	2.302	0.052	0.1455	0.0027	0.35	2326	53	2310	53	2294	43	2308	20	0.372
412 g110	5.37	0.091	0.3377	0.0069	0.72	2.961	0.061	0.1153	0.0015	0.57	1876	38	1880	32	1885	25	1881	13	0.72
412 g111	15.35	0.32	0.544	0.012	0.83	1.838	0.041	0.2039	0.0027	0.41	2800	62	2837	59	2858	38	2850	16	0.036
412 g112	4.37	0.14	0.303	0.011	0.58	3.3	0.12	0.1045	0.0032	0.67	1706	62	1707	55	1706	52	1707	26	0.982
412 g114	0.891	0.028	0.1034	0.0025	0.37	9.67	0.23	0.0625	0.002	0.4	634	15	647	20	691	22	640	12	0.129
412 g115	1.678	0.038	0.1689	0.0044	0.66	5.92	0.15	0.0723	0.0014	0.56	1006	26	1000	23	994	19	1000	14	0.524
412 g117	7.44	0.15	0.392	0.0074	0.67	2.551	0.048	0.1369	0.0022	0.41	2132	40	2166	44	2188	35	2170	18	0.009
412 g118	0.524	0.025	0.0694	0.0016	0.21	14.41	0.33	0.0548	0.0026	0.24	433	10	428	20	404	19	431.6	9	0.586
412 g119	0.852	0.017	0.101	0.002	0.48	9.9	0.2	0.0612	0.0013	0.53	620	12	626	12	646	14	624.2	8.8	0.314
412 g120	0.463	0.017	0.0609	0.0016	0.45	16.42	0.43	0.0554	0.0018	0.19	381	10	386	14	428	14	382.8	9	0.361
Sample 413A		Bridges of Ross		GPS coordinates:			52.5914679	-9.8750846
Zircon	207U/235Pb	2 sigma	206U/238Pb	2 sigma	Rho	238U/206Pb	2 sigma	207Pb/206Pb	2 sigma	Rho	206Pb/238U (Ma)	2 sigma (Ma)	207Pb/235U (Ma)	2 sigma (Ma)	207Pb/206Pb (Ma)	2 sigma (Ma)	Concordia age (Ma)	Concordia age error (Ma)	Probability
413A g1r	7.55	0.51	0.415	0.018	0.3	2.41	0.1	0.1319	0.0089	0.35	2238	97	2179	147	2123	143	2196	54	0.172
413A g1c	7.38	0.13	0.3906	0.0073	0.57	2.56	0.048	0.137	0.0021	0.52	2126	40	2159	38	2190	34	2161	16	0.019
413A g2r	1.052	0.038	0.1184	0.0034	0.76	8.45	0.24	0.0642	0.0015	0	721	21	730	26	748	17	726	18	0.203
413A g2c	1.388	0.06	0.1447	0.0044	0.6	6.91	0.21	0.069	0.0025	0.08	871	26	884	38	899	33	877	23	0.259
413A g3c	2.306	0.061	0.2066	0.004	0.56	4.84	0.094	0.0807	0.0017	0.22	1211	23	1214	32	1214	26	1213	18	0.716
413A g7	0.796	0.025	0.0953	0.0024	0.46	10.49	0.26	0.0606	0.0017	0.36	587	15	595	19	625	18	591	12	0.292
413A g9	0.868	0.027	0.1002	0.002	0.27	9.98	0.2	0.0622	0.0017	0.33	616	12	634	20	681	19	622	10	0.02
413A g11	2.444	0.051	0.215	0.0041	0.65	4.651	0.089	0.082	0.0012	0.38	1255	24	1256	26	1246	18	1256	15	0.975
413A g12	0.936	0.062	0.1034	0.0032	0.36	9.67	0.3	0.0647	0.0038	0.09	634	20	671	44	765	45	639	18	0.02
413A g13	3.803	0.087	0.2731	0.005	0.31	3.662	0.067	0.1015	0.0025	0.41	1557	28	1593	36	1652	41	1583	17	0.005
413A g14	0.82	0.031	0.099	0.0025	0.35	10.1	0.26	0.0601	0.0022	0.27	609	15	608	23	607	22	608	13	0.957
413A g15	0.857	0.048	0.1018	0.004	0.78	9.82	0.39	0.0613	0.0024	-0.09	625	25	628	35	650	25	626	23	0.672
413A g18	0.898	0.02	0.1068	0.0022	0.33	9.36	0.19	0.061	0.0014	0.5	654	13	651	14	639	15	651.9	9.4	0.613
413A g19	0.845	0.055	0.0971	0.0038	0.27	10.3	0.4	0.0636	0.0038	0.42	597	23	622	40	728	44	605	20	0.134
413A g21	0.518	0.021	0.0662	0.0017	0.16	15.11	0.39	0.0564	0.0024	0.47	413	11	424	17	468	20	416.6	8.9	0.187
413A g22	6.79	0.15	0.3772	0.0079	0.64	2.651	0.056	0.1306	0.0023	0.37	2063	43	2084	46	2106	37	2086	19	0.139
413A g23	0.883	0.044	0.0996	0.0025	0.13	10.04	0.25	0.0642	0.0033	0.36	612	15	643	32	748	38	619	13	0.021
413A g24	0.719	0.028	0.0886	0.002	0.56	11.29	0.25	0.0585	0.0024	0.43	547	12	550	21	549	23	548	12	0.686
413A g25	0.867	0.018	0.1042	0.0022	0.45	9.6	0.2	0.0604	0.0014	0.56	639	13	634	13	618	14	635.3	9.2	0.408
413A g27	0.511	0.013	0.0664	0.0016	0.74	15.06	0.36	0.0558	0.001	0.32	414	10	419	11	444.4	8	417.6	8.5	0.164
413A g28	0.877	0.019	0.1042	0.002	0.4	9.6	0.18	0.061	0.0013	0.5	639	12	639	14	639	14	639.2	9.1	0.949
413A g29	7.66	0.14	0.4014	0.0074	0.61	2.491	0.046	0.1381	0.0022	0.49	2175	40	2192	40	2204	35	2193	16	0.228
413A g30	0.593	0.022	0.0733	0.0017	0.16	13.64	0.32	0.0588	0.0024	0.42	456	11	473	18	560	23	461.3	8.9	0.036
413A g32	6.4	0.18	0.369	0.01	0.36	2.713	0.074	0.1263	0.0038	0.55	2023	55	2032	57	2047	62	2031	24	0.672
413A g34	0.853	0.021	0.1017	0.0022	0.45	9.83	0.21	0.0608	0.0014	0.47	624	14	626	15	632	15	626	10	0.764
413A g35	0.839	0.056	0.1022	0.0034	0.42	9.78	0.33	0.0604	0.004	0.12	627	21	619	41	618	41	626	19	0.547
413A g36	2.447	0.073	0.2105	0.0064	0.68	4.75	0.14	0.0846	0.0019	0.37	1231	37	1257	37	1306	29	1258	21	0.046
413A g37	0.732	0.02	0.0881	0.0021	0.16	11.35	0.27	0.0604	0.002	0.56	544	13	558	15	618	20	551.4	9.2	0.087
413A g38	0.832	0.023	0.0973	0.0019	0.35	10.28	0.2	0.062	0.0017	0.34	599	12	615	17	674	18	605	10	0.019
413A g39	4.014	0.069	0.2887	0.0052	0.49	3.464	0.062	0.1006	0.0015	0.47	1635	29	1637	28	1635	24	1637	14	0.859
413A g40	0.728	0.035	0.0871	0.0029	0.38	11.48	0.38	0.0608	0.003	0.26	538	18	555	27	632	31	544	15	0.111
413A g41	2.033	0.062	0.1887	0.0041	0.42	5.3	0.12	0.078	0.0021	0.27	1114	24	1127	34	1147	31	1121	18	0.291
413A g42	0.846	0.04	0.0991	0.0029	0.16	10.09	0.3	0.0616	0.003	0.4	609	18	622	29	660	32	614	14	0.298
413A g43	0.846	0.024	0.1034	0.0023	0.46	9.67	0.22	0.059	0.0017	0.47	634	14	622	18	567	16	628	11	0.087
413A g44	2.845	0.055	0.2372	0.0049	0.47	4.216	0.087	0.0873	0.0016	0.46	1372	28	1367	26	1367	25	1368	14	0.682
413A g45	0.778	0.043	0.0926	0.0024	0.09	10.8	0.28	0.0611	0.0036	0.31	571	15	584	32	643	38	574	13	0.325
413A g46	0.864	0.018	0.1007	0.0021	0.63	9.93	0.21	0.0621	0.0011	0.46	619	13	632	13	678	12	629	10	0.005
413A g47	5.34	0.15	0.3301	0.0065	0.55	3.029	0.06	0.1179	0.0029	0.1	1839	36	1875	53	1925	47	1867	23	0.007
413A g48	0.674	0.025	0.0843	0.0017	0.4	11.86	0.24	0.0579	0.0019	0.1	522	11	523	19	526	17	522	10	0.846
413A g49	0.961	0.037	0.111	0.0031	0.3	9.01	0.25	0.0631	0.0024	0.38	679	19	684	26	712	27	681	15	0.633
413A g50	0.694	0.024	0.086	0.0023	0.36	11.63	0.31	0.0586	0.002	0.4	532	14	535	19	552	19	533	12	0.671
413A g51	1.076	0.031	0.1207	0.0028	0.17	8.29	0.19	0.0644	0.0022	0.45	735	17	742	21	755	26	738	12	0.482
413A g52	6.4	0.14	0.3692	0.0083	0.47	2.709	0.061	0.1258	0.0029	0.6	2026	46	2032	44	2040	47	2032	19	0.701
413A g53	0.51	0.013	0.0654	0.0011	0.44	15.29	0.26	0.0565	0.0013	0.27	408.4	6.9	418	11	472	11	411	6.3	0.016
413A g54	0.749	0.038	0.0909	0.0025	0.32	11	0.3	0.0591	0.0026	0.21	561	15	568	29	571	25	562	14	0.544
413A g55	0.502	0.019	0.0661	0.0014	0.41	15.13	0.32	0.0542	0.0018	0.23	412.6	8.7	413	16	379	13	412.7	8.2	0.943
413A g57	4.096	0.1	0.2869	0.0067	0.37	3.486	0.081	0.1042	0.0028	0.45	1626	38	1654	40	1700	46	1649	19	0.086
413A g58	0.759	0.025	0.0945	0.0023	0.27	10.58	0.26	0.0588	0.0022	0.45	582	14	573	19	560	21	578	11	0.306
413A g59	1.692	0.07	0.1714	0.0047	0.52	5.83	0.16	0.0715	0.0025	0.16	1020	28	1006	42	972	34	1013	23	0.262
413A g60	0.51	0.011	0.0673	0.0012	0.62	14.86	0.26	0.0549	0.001	0.38	419.9	7.5	418.4	9	409	7.4	419.2	6.6	0.658
413A g61	0.475	0.016	0.0619	0.0012	0.14	16.16	0.31	0.0551	0.0018	0.38	387.2	7.5	395	13	416	14	389.2	6.4	0.228
413A g62	0.852	0.025	0.0992	0.0022	0.26	10.08	0.22	0.0622	0.002	0.45	610	14	626	18	681	22	617	11	0.049
413A g63	0.817	0.025	0.0996	0.0024	0.26	10.04	0.24	0.0595	0.002	0.37	612	15	606	19	585	20	609	11	0.504
413A g65	0.531	0.019	0.0673	0.0022	0.22	14.86	0.49	0.0577	0.0025	0.61	420	14	432	15	518	22	427	10	0.119
413A g66	0.921	0.024	0.1085	0.0027	0.48	9.22	0.23	0.0616	0.0016	0.47	664	17	663	17	660	17	663	12	0.877
413A g67	0.933	0.023	0.1103	0.0024	0.55	9.07	0.2	0.0612	0.0014	0.38	674	15	669	16	646	15	671	11	0.397
413A g68	0.843	0.029	0.1016	0.0024	0.34	9.84	0.23	0.0602	0.002	0.36	624	15	621	21	611	20	623	12	0.732
413A g69	0.526	0.013	0.069	0.0014	0.56	14.49	0.29	0.0554	0.0012	0.28	430.1	8.7	429	11	428.4	9.3	429.7	7.5	0.807
413A g71	0.918	0.02	0.1088	0.0024	0.55	9.19	0.2	0.0612	0.0013	0.52	666	15	661	14	646	14	662	10	0.454
413A g72	0.864	0.024	0.1026	0.0023	0.57	9.75	0.22	0.061	0.0014	0.24	630	14	632	18	639	15	631	12	0.665
413A g73	0.74	0.023	0.0883	0.0017	0.48	11.33	0.22	0.061	0.0015	0.14	545	11	562	17	639	16	549	10	0.006
413A g74	6.46	0.19	0.3727	0.0079	0.62	2.683	0.057	0.125	0.0028	0.24	2042	43	2040	60	2029	45	2041	26	0.912
413A g75	0.841	0.022	0.0977	0.0016	0.36	10.24	0.17	0.0624	0.0016	0.25	601	10	620	16	688	18	606.6	8.6	0.003
413A g76	0.514	0.012	0.0677	0.0014	0.45	14.77	0.31	0.055	0.0012	0.5	422.3	8.7	421	10	412.2	9	421.7	7	0.79
413A g77	0.845	0.02	0.0994	0.0019	0.35	10.06	0.19	0.0613	0.0013	0.4	611	12	622	15	650	14	616.5	9.1	0.08
413A g78	0.731	0.017	0.089	0.0018	0.49	11.24	0.23	0.0593	0.0013	0.44	550	11	557	13	578	13	553.8	8.9	0.148
413A g81	6.9	0.13	0.3748	0.0088	0.73	2.668	0.063	0.1336	0.0022	0.62	2052	48	2099	40	2146	35	2109	15	0.003
413A g82	0.822	0.037	0.0934	0.0023	0.29	10.71	0.26	0.063	0.0031	0.14	576	14	609	27	708	35	583	13	0.002
413A g83	0.684	0.018	0.0828	0.002	0.5	12.08	0.29	0.0599	0.0014	0.45	513	12	529	14	600	14	522	10	0.004
413A g84	0.768	0.024	0.0939	0.0019	0.32	10.65	0.22	0.0593	0.0018	0.36	579	12	579	18	578	18	579	10	0.994
413A g86	0.853	0.032	0.1018	0.0029	0.45	9.82	0.28	0.0608	0.0022	0.17	625	18	626	23	632	23	626	15	0.882
413A g87	6.84	0.15	0.3822	0.0077	0.37	2.616	0.053	0.1298	0.003	0.55	2087	42	2091	46	2095	48	2090	19	0.797
413A g88	0.773	0.029	0.0952	0.0022	0.4	10.5	0.24	0.0592	0.0023	0.19	586	14	581	22	574	22	585	12	0.565
413A g89	6.55	0.14	0.3662	0.0083	0.68	2.731	0.062	0.1296	0.0023	0.44	2011	46	2053	44	2093	37	2059	18	0.006
413A g91	0.791	0.024	0.0939	0.0024	0.42	10.65	0.27	0.0607	0.0016	0.39	579	15	592	18	629	17	586	12	0.079
413A g92	0.847	0.02	0.1	0.0019	0.13	10	0.19	0.0615	0.0017	0.57	614	12	623	15	657	18	618.7	8.3	0.238
413A g96	1.568	0.041	0.1611	0.0032	0.34	6.21	0.12	0.0706	0.0018	0.37	963	19	958	25	946	24	960	14	0.592
413A g97	0.843	0.031	0.1001	0.0024	0.04	9.99	0.24	0.0614	0.0026	0.53	615	15	621	23	653	28	617	11	0.592
413A g98	1.065	0.028	0.1216	0.0024	0.63	8.22	0.16	0.0634	0.0013	0.2	740	15	736	19	722	15	738	12	0.556
413A g100	0.885	0.042	0.1035	0.003	0.27	9.66	0.28	0.0616	0.0028	0.33	635	18	644	31	660	30	638	16	0.476
413A g101	0.836	0.04	0.0994	0.0023	0.17	10.06	0.23	0.0608	0.003	0.33	611	14	617	30	632	31	612	12	0.613
413A g103	0.856	0.019	0.1033	0.0016	0.37	9.68	0.15	0.0597	0.0013	0.4	634	10	628	14	593	13	631.3	8.1	0.296
413A g105	0.497	0.016	0.0669	0.0015	0.47	14.95	0.34	0.0538	0.0016	0.29	417.5	9.4	410	13	363	11	414.8	8.4	0.131
413A g106	4.134	0.092	0.2951	0.0065	0.62	3.389	0.075	0.1015	0.0018	0.39	1667	37	1661	37	1652	29	1661	18	0.642
413A g107	0.828	0.034	0.1017	0.0026	0.18	9.83	0.25	0.0591	0.0027	0.43	624	16	613	25	571	26	620	13	0.28
413A g108	0.673	0.017	0.0844	0.0019	0.53	11.85	0.27	0.0581	0.0013	0.28	522	12	523	13	534	12	522.5	9.4	0.969
413A g109	0.697	0.014	0.0865	0.0021	0.7	11.56	0.28	0.0584	0.001	0.56	535	13	537	11	544.8	9.3	537.1	8.4	0.622
413A g110	0.883	0.026	0.1056	0.0023	0.61	9.47	0.21	0.0605	0.0014	0.25	647	14	643	19	622	14	645	12	0.451
413A g111	0.413	0.016	0.0567	0.0019	0.64	17.64	0.59	0.053	0.0015	0.25	356	12	351	14	328.8	9.3	353	10	0.359
413A g112	0.84	0.024	0.1003	0.0024	0.55	9.97	0.24	0.0601	0.0015	0.36	616	15	619	18	607	15	618	12	0.648
413A g114	1.213	0.03	0.1315	0.003	0.32	7.6	0.17	0.067	0.0018	0.49	796	18	807	20	838	23	803	12	0.265
413A g115	0.762	0.024	0.095	0.0022	0.44	10.53	0.24	0.0578	0.0016	0.35	585	14	575	18	522	14	581	11	0.165
413A g118	0.902	0.03	0.1031	0.0024	0.29	9.7	0.23	0.0632	0.002	0.46	633	15	653	22	715	23	641	12	0.025
413A g119	0.816	0.018	0.0976	0.0018	0.46	10.25	0.19	0.0606	0.0013	0.45	600	11	606	13	625	13	603.3	8.8	0.309
413A g120	0.757	0.028	0.0887	0.0021	0.22	11.27	0.27	0.0616	0.0023	0.43	548	13	572	21	660	25	556	11	0.007
Sample 414B		Bridges of Ross		GPS coordinates:			52.5914679	-9.8750846
Zircon	207U/235Pb	2 sigma	206U/238Pb	2 sigma	Rho	238U/206Pb	2 sigma	207Pb/206Pb	2 sigma	Rho	206Pb/238U (Ma)	2 sigma (Ma)	207Pb/235U (Ma)	2 sigma (Ma)	207Pb/206Pb (Ma)	2 sigma (Ma)	Concordia age (Ma)	Concordia age error (Ma)	Probability
414B g1c	0.796	0.023	0.0952	0.0019	0.45	10.5	0.21	0.0609	0.0017	0.28	586	12	595	17	636	18	589	10	0.191
414B g2r	0.847	0.033	0.1011	0.0021	-0.07	9.89	0.21	0.0604	0.0026	0.5	621	13	623	24	618	27	622	10	0.849
414B g2c	0.863	0.033	0.1035	0.0026	0.32	9.66	0.24	0.0611	0.0024	0.29	635	16	632	24	643	25	634	13	0.747
414B g4c	0.84	0.019	0.1011	0.0022	0.53	9.89	0.22	0.0602	0.0013	0.44	621	14	619	14	611	13	620	10	0.767
414B g5r	0.832	0.03	0.0984	0.002	0.35	10.16	0.21	0.0612	0.002	0.11	605	12	615	22	646	21	607	11	0.247
414B g5c	0.834	0.031	0.1	0.0024	0.18	10	0.24	0.0606	0.0024	0.41	614	15	616	23	625	25	615	12	0.888
414B g6c	0.743	0.038	0.0888	0.0024	0.22	11.26	0.3	0.0609	0.003	0.27	548	15	564	29	636	31	552	13	0.184
414B g8r	0.845	0.023	0.0999	0.002	0.44	10.01	0.2	0.0613	0.0016	0.31	614	12	622	17	650	17	617	10	0.21
414B g8c	2.291	0.076	0.2077	0.0058	0.23	4.81	0.13	0.0796	0.0026	0.52	1217	34	1210	40	1187	39	1212	21	0.681
414B g17	0.804	0.037	0.0994	0.0023	0.35	10.06	0.23	0.0583	0.0027	0.22	611	14	599	28	541	25	608	13	0.248
414B g18	0.826	0.036	0.0964	0.0021	0.32	10.37	0.23	0.0621	0.0026	0.21	593	13	611	27	678	28	597	12	0.07
414B g19	4.746	0.083	0.3137	0.0066	0.76	3.188	0.067	0.1096	0.0015	0.59	1759	37	1775	31	1793	25	1780	13	0.156
414B g20	0.704	0.024	0.0869	0.0018	0.04	11.51	0.24	0.0588	0.0023	0.48	537	11	541	18	560	22	538.6	8.7	0.648
414B g22	1.147	0.053	0.1294	0.0032	0.38	7.73	0.19	0.0647	0.0028	0.25	784	19	776	36	765	33	782	17	0.486
414B g25	1.132	0.086	0.1218	0.0043	0.26	8.21	0.29	0.0692	0.0055	0.21	741	26	769	58	905	72	746	23	0.189
414B g27	0.709	0.035	0.0857	0.0021	0.25	11.67	0.29	0.06	0.003	0.2	530	13	544	27	604	30	533	12	0.189
414B g28	0.842	0.041	0.1019	0.0026	0.13	9.81	0.25	0.0601	0.0031	0.33	626	16	620	30	607	31	624	13	0.679
414B g29	0.731	0.032	0.0892	0.0021	0.39	11.21	0.26	0.0593	0.0024	0.12	551	13	557	24	578	23	552	12	0.483
414B g31	0.836	0.02	0.0996	0.0017	0.62	10.04	0.17	0.0607	0.0012	0.12	612	10	617	15	629	12	613.8	9.4	0.292
414B g32	0.775	0.022	0.0929	0.002	0.42	10.76	0.23	0.0604	0.0015	0.31	573	12	583	17	618	15	577	10	0.129
414B g34	7.53	0.14	0.4009	0.0074	0.67	2.494	0.046	0.136	0.002	0.44	2173	40	2177	40	2177	32	2177	16	0.794
414B g35	5.83	0.16	0.3483	0.008	0.65	2.871	0.066	0.1209	0.0025	0.29	1926	44	1951	54	1970	41	1951	24	0.094
414B g40	0.478	0.012	0.0644	0.0014	0.51	15.53	0.34	0.0543	0.0012	0.34	402.3	8.7	397	10	383.5	8.5	399.3	7.3	0.174
414B g41	3.433	0.079	0.2614	0.0052	0.46	3.83	0.08	0.0952	0.002	0.4	1497	30	1512	35	1532	32	1509	18	0.218
414B g45	0.798	0.025	0.0945	0.0019	0.61	10.58	0.21	0.0608	0.0015	0.08	582	12	596	19	632	16	585	11	0.019
414B g46	0.826	0.021	0.0968	0.0029	0.48	10.33	0.31	0.0623	0.0018	0.59	596	18	611	16	684	20	609	11	0.04
414B g47	0.713	0.018	0.0865	0.0013	0.74	11.56	0.17	0.0595	0.0013	0.13	534.8	8	547	14	585	13	534.2	7.7	0.001
414B g50	6.59	0.15	0.3685	0.0076	0.64	2.714	0.056	0.1295	0.0023	0.33	2022	42	2058	47	2091	37	2061	20	0.009
414B g51	0.739	0.033	0.0885	0.0019	0.27	11.3	0.24	0.0605	0.0027	0.2	547	12	562	25	622	28	549	11	0.121
414B g53	0.866	0.019	0.1006	0.002	0.47	9.94	0.2	0.0626	0.0014	0.53	618	12	633	14	695	16	627.4	9.4	0.007
414B g54	0.501	0.021	0.0647	0.0014	0.2	15.46	0.33	0.0559	0.0025	0.35	404.1	8.7	412	17	448	20	405.9	7.9	0.273
414B g55	0.454	0.011	0.0599	0.0012	0.48	16.69	0.33	0.0549	0.0011	0.41	375	7.5	380.1	9.2	408.2	8.2	377.3	6.4	0.186
414B g56	0.927	0.039	0.1072	0.0024	0.29	9.33	0.21	0.0626	0.0025	0.23	656	15	666	28	695	28	659	13	0.367
414B g57	0.839	0.026	0.0997	0.0026	0.41	10.03	0.26	0.0611	0.0019	0.4	613	16	619	19	643	20	616	12	0.461
414B g59	0.912	0.03	0.1063	0.0023	0.54	9.41	0.2	0.0618	0.0017	0.21	651	14	658	22	667	18	653	13	0.336
414B g60	0.522	0.013	0.0664	0.0012	0.51	15.06	0.27	0.0567	0.0012	0.24	414.4	7.5	426	11	480	10	418.2	6.8	0.003
414B g61	0.821	0.027	0.0977	0.0019	0.45	10.24	0.2	0.0608	0.0018	0.15	601	12	609	20	632	19	603	11	0.278
414B g64	0.711	0.033	0.0905	0.0023	0.23	11.05	0.28	0.0571	0.0026	0.26	558	14	545	25	495	23	555	12	0.212
414B g65	0.53	0.017	0.0683	0.0013	0.2	14.64	0.28	0.0562	0.0019	0.35	425.9	8.1	432	14	460	16	427.6	7	0.342
414B g67	0.876	0.032	0.1005	0.0027	0.21	9.95	0.27	0.0636	0.0026	0.49	617	17	639	23	728	30	627	13	0.04
414B g68	0.516	0.015	0.0663	0.0013	0.47	15.08	0.3	0.0563	0.0015	0.16	413.8	8.1	422	12	464	12	416.2	7.4	0.066
414B g69	6.56	0.14	0.3679	0.0083	0.73	2.718	0.061	0.1285	0.0021	0.36	2020	46	2054	44	2078	34	2062	18	0.015
414B g71	0.997	0.027	0.1147	0.0029	0.63	8.72	0.22	0.063	0.0014	0.39	700	18	702	19	708	16	702	13	0.731
414B g72	4.146	0.076	0.2911	0.0058	0.52	3.435	0.068	0.1028	0.0019	0.49	1647	33	1663	30	1675	31	1663	15	0.183
414B g73	0.656	0.018	0.0817	0.0016	0.4	12.24	0.24	0.0581	0.0015	0.39	506	10	512	14	534	14	508.5	8.5	0.299
414B g75	0.731	0.028	0.0907	0.0016	0.37	11.03	0.19	0.0576	0.002	0.15	560	10	557	21	515	18	559.3	9.2	0.746
414B g76	0.938	0.046	0.1048	0.0029	0.5	9.54	0.26	0.0642	0.0039	0.3	642	18	672	33	748	45	647	17	0.007
414B g77	10.22	0.18	0.4524	0.0086	0.43	2.21	0.042	0.1629	0.0027	0.64	2406	46	2455	43	2486	41	2455	16	0.004
414B g78	0.858	0.016	0.1023	0.0019	0.35	9.78	0.18	0.061	0.0013	0.55	628	12	629	12	639	14	628.7	7.9	0.841
414B g79	0.748	0.024	0.0906	0.0018	0.41	11.04	0.22	0.0597	0.0017	0.25	559	11	567	18	593	17	561	10	0.241
414B g81	20.77	0.53	0.62	0.016	0.78	1.613	0.042	0.243	0.0039	0.3	3110	80	3128	80	3140	50	3133	21	0.441
414B g83	0.774	0.03	0.096	0.0027	0.45	10.42	0.29	0.0584	0.0021	0.21	591	17	582	23	545	20	587	14	0.304
414B g84	0.844	0.023	0.1012	0.0022	0.53	9.88	0.21	0.0604	0.0014	0.31	621	14	621	17	618	14	621	11	0.989
414B g86	0.762	0.028	0.0917	0.0018	0.25	10.91	0.21	0.0601	0.0022	0.25	566	11	575	21	607	22	568	10	0.261
414B g89	3.74	0.1	0.2715	0.007	0.63	3.683	0.095	0.0998	0.0022	0.41	1548	40	1580	42	1620	36	1581	21	0.021
414B g91	0.824	0.03	0.0971	0.002	0.31	10.3	0.21	0.0615	0.0021	0.28	597	12	610	22	657	22	601	11	0.135
414B g94	0.833	0.028	0.1008	0.0027	0.36	9.92	0.27	0.06	0.0019	0.35	619	17	615	21	604	19	617	13	0.666
414B g96	4.888	0.098	0.3224	0.0072	0.53	3.102	0.069	0.1105	0.0023	0.54	1801	40	1800	36	1808	38	1800	17	0.933
414B g98	10.79	0.22	0.4694	0.0093	0.51	2.13	0.042	0.1665	0.0033	0.49	2481	49	2505	51	2523	50	2506	19	0.167
414B g99	0.501	0.014	0.0657	0.0013	0.55	15.22	0.3	0.0549	0.0013	0.23	410.2	8.1	412	12	408	10	410.9	7.5	0.602
414B g100	0.881	0.04	0.1025	0.002	0.57	9.76	0.19	0.0617	0.0024	-0.15	629	12	642	29	664	26	629	12	0.162
414B g101	0.819	0.027	0.0989	0.0021	0.13	10.11	0.21	0.0601	0.0021	0.48	608	13	607	20	607	21	608	10	0.959
414B g103	0.789	0.027	0.0945	0.0024	0.34	10.58	0.27	0.0606	0.0021	0.38	582	15	591	20	625	22	586	12	0.315
414B g104	0.834	0.032	0.1038	0.0024	0.4	9.63	0.22	0.0582	0.002	0.24	637	15	616	24	537	18	630	13	0.018
414B g106	4.97	0.12	0.3219	0.0073	0.77	3.107	0.07	0.1125	0.0017	0.32	1799	41	1814	44	1840	28	1818	19	0.202
414B g110	0.858	0.023	0.1029	0.0024	0.57	9.72	0.23	0.0604	0.0014	0.35	631	15	629	17	618	14	630	12	0.706
414B g112	0.842	0.017	0.1003	0.002	0.4	9.97	0.2	0.0611	0.0014	0.4	616	12	620	13	643	15	618.9	8.6	0.487
414B g113	0.932	0.061	0.1042	0.0033	0.37	9.6	0.3	0.0649	0.0041	0.11	639	20	669	44	771	49	643	19	0.055
414B g115	13.74	0.28	0.512	0.012	0.65	1.953	0.046	0.1951	0.0035	0.56	2665	62	2732	56	2786	50	2743	18	0.001
414B g120	0.94	0.065	0.1069	0.0038	0.11	9.35	0.33	0.0623	0.0049	0.45	655	23	673	47	684	54	660	19	0.348
414B g121	0.879	0.034	0.1026	0.0025	0.3	9.75	0.24	0.0616	0.0022	0.37	630	15	640	25	660	24	633	13	0.273
g1c = core grain 1
g1r = rim grain 1
2 Sigma are abs.
Rho = error correlation
Concordant ages = probability higher than 0.001
